# Supplementary material
Source: publisher figshare collection journal article supplement (https://gsapubs.figshare.com/ndownloader/files/22411812)
Supplement: Supplementary file 3 [file 22411812]

## Text S2: Scarp-profile locations and VS measurements

| Vertical Separation (VS) measurements for the Warm Springs section |            |            |      |                  |                |                |                                                    |
|--------------------------------------------------------------------|------------|------------|------|------------------|----------------|----------------|----------------------------------------------------|
| Name                                                               | Latitude   | Longitude  | Type | Preferred VS (m) | Minimum VS (m) | Maximum VS (m) | Notes                                              |
| 1                                                                  | 4913959.08 | 260469.379 | 1983 | 0.21             | 0.15           | 0.54           | abundant small vegetation                          |
| 2                                                                  | 4913868.73 | 260501.394 | 1983 | 0.08             | 0.02           | 0.23           | abundant small vegetation                          |
| 3                                                                  | 4913711.31 | 260567.917 | PH   | 1.68             | 1.40           | 1.80           | -                                                  |
| 4                                                                  | 4913709.61 | 260585.75  | 1983 | 0.24             | 0.19           | 0.33           | -                                                  |
| 5                                                                  | 4913661.3  | 260621.84  | 1983 | 0.27             | 0.11           | 0.38           | scarp better expressed on 10cm DSM                 |
| 6                                                                  | 4913594.06 | 260662.347 | 1983 | 0.25             | 0.19           | 0.66           | -                                                  |
| 7                                                                  | 4913513.53 | 260712.585 | 1983 | 0.16             | 0.07           | 0.25           | vegetation on scarp, but surfaces VS               |
| 8                                                                  | 4913478.11 | 260739.758 | PH   | 2.40             | 2.05           | 2.89           | broad scarp, but clear upper surface               |
| 9                                                                  | 4913441.7  | 260762.823 | 1983 | 0.29             | 0.19           | 0.37           | scarp mod well expressed                           |
| 10                                                                 | 4913370.92 | 260815.211 | 1983 | 0.32             | 0.21           | 0.53           | poorly expressed upper surface                     |
| 11                                                                 | 4913338.3  | 260841.246 | 1983 | 0.26             | 0.15           | 0.34           | mod well expressed surfaces                        |
| 12                                                                 | 4913188.93 | 260933.652 | 1983 | 0.20             | 0.09           | 0.28           | heavy vegetation; scarp best expressed on 10cm DSM |
| 13                                                                 | 4913049.6  | 260975.985 | 1983 | 0.24             | 0.06           | 0.48           | heavy vegetation; scarp best expressed on 10cm DSM |
| 14                                                                 | 4912948.9  | 261001.491 | 1983 | 0.34             | 0.26           | 0.62           | heavy vegetation; poor scarp expressed             |
| 15                                                                 | 4912872.31 | 261023.359 | 1983 | 0.26             | 0.08           | 0.31           | broad scarp                                        |
| 16                                                                 | 4912778.61 | 261069.595 | 1983 | 0.15             | 0.13           | 0.33           | broad scarp; scarp mod well expressed              |
| 17                                                                 | 4912746.6  | 261055.347 | PH   | 2.65             | 2.50           | 3.08           | minimal vegetation removal                         |
| 18                                                                 | 4912662.01 | 261158.422 | 1983 | 0.17             | 0.06           | 0.23           | mod to poor scarp expression                       |
| 19                                                                 | 4912597.24 | 261193.658 | 1983 | 0.27             | 0.15           | 0.45           | scarp mod well expressed                           |
| 20                                                                 | 4912521.9  | 261226.599 | 1983 | 0.24             | 0.23           | 0.62           | scarp well expressed on 10cm DSM                   |
| 21                                                                 | 4912311.7  | 261329.601 | 1983 | 0.32             | 0.16           | 0.47           | scarp mod well expressed                           |
| 22                                                                 | 4912191.6  | 261394.927 | PH   | 3.23             | 2.44           | 3.31           | no vegetation removal. double scarp                |
| 23                                                                 | 4912158.84 | 261431.745 | 1983 | 0.13             | 0.06           | 0.26           | scarp mod well expressed                           |
| 24                                                                 | 4912094.69 | 261486.898 | 1983 | 0.31             | 0.31           | 0.40           | scarp well expressed                               |
| 25                                                                 | 4912076.49 | 261472.055 | PH   | 3.23             | 2.34           | 3.36           | no vegetation removal; double scarp                |

## Text S2: Scarp-profile locations and VS measurements

|    |            |            |      |      |      |      |                                                                     |
|----|------------|------------|------|------|------|------|---------------------------------------------------------------------|
| 26 | 4912001.08 | 261554.314 | 1983 | 0.26 | 0.21 | 0.53 | scarp well expressed                                                |
| 27 | 4911974.73 | 261610.591 | 1983 | 0.28 | 0.22 | 0.28 | scarp well expressed                                                |
| 28 | 4911943.06 | 261657.666 | 1983 | 0.22 | 0.20 | 0.37 | scarp well expressed                                                |
| 29 | 4911886.6  | 261733.98  | PH   | 2.56 | 1.42 | 3.15 | lower scarp: 1.0-1.5m, upper scarp: 1.6-1.9m; no vegetation removal |
| 30 | 4911870.86 | 261717.576 | PH   | 1.37 | 1.25 | 2.20 | lower scarp only; no vegetation removal                             |
| 31 | 4911836.7  | 261801.66  | 1983 | 0.32 | 0.21 | 0.35 | scarp mod well expressed                                            |
| 32 | 4911824.28 | 261822.417 | 1983 | 0.17 | 0.14 | 0.25 | scarp mod well expressed; minimal vegetation removal                |
| 33 | 4911777.32 | 261858.929 | 1983 | 0.28 | 0.27 | 0.39 | scarp well expressed                                                |
| 34 | 4911727.2  | 261894.847 | 1983 | 0.24 | 0.10 | 0.33 | scarp poor-mod expressed; abundant vegetation                       |
| 35 | 4911645.5  | 261875.519 | PH   | 2.82 | 2.54 | 3.74 | 2.54m using lower scarp face.; no vegetation removal                |
| 36 | 4911607.11 | 261953.825 | PH   | 3.86 | 2.30 | 5.36 | pref. using lower scarp.; low-mod confidence                        |
| 38 | 4911550.44 | 262035.335 | PH   | 1.40 | 1.13 | 1.50 | 0.51-0.59m antithetic acct for; no vegetation removal               |
| 39 | 4911482.3  | 262074.949 | PH   | 2.35 | 2.25 | 2.44 | ~1m antithetic accounted for; no vegetation removal                 |
| 40 | 4911428.85 | 262098.889 | PH   | 2.88 | 2.67 | 3.23 | 1.18-1.25 antithetic accounted for; no vegetation removal           |
| 41 | 4911419.44 | 262173.395 | 1983 | 0.20 | 0.12 | 0.24 | heavy vegetation; scarp poor-mod expressed                          |
| 42 | 4911231.2  | 262304.403 | PH   | 3.31 | 3.11 | 3.49 | ~1m antithetic accounted for; no vegetation removal                 |
| 44 | 4911016.43 | 262730.368 | PH   | 3.68 | 2.93 | 5.03 | 1.1-2.1m antithetic VS (p43) accounted for; no vegetation removal   |
| 45 | 4910903.72 | 262548.808 | PH   | 2.11 | 1.16 | 2.31 | 0.06-1.28m m antithetic accounted for; no vegetation removal        |
| 46 | 4910831.19 | 262640.108 | PH   | 3.84 | 3.50 | 4.53 | 2m antithetic accounted for; no vegetation removal, summed with p47 |
| 49 | 4910449.08 | 262945.636 | PH   | 3.86 | 3.28 | 4.52 | 1.58-2.08m antithetic accounted for; no vegetation removal          |
| 50 | 4910261.58 | 263130.289 | PH   | 4.11 | 3.52 | 5.06 | 0.89-1.53m antithetic accounted for; no vegetation removal          |
| 51 | 4909790.33 | 263597.108 | PH   | 3.28 | 2.86 | 3.67 | no antithetic scarps; vegetation removed                            |
| 52 | 4909752.25 | 263599.344 | PH   | 3.26 | 3.19 | 3.82 | no antithetic scarps; vegetation removed                            |
| 53 | 4909598.38 | 263619.806 | 1983 | 0.42 | 0.22 | 0.49 | scarp mod expressed; vegetation removed                             |
| 54 | 4909558.53 | 263630.713 | 1983 | 0.34 | 0.12 | 0.40 | scarp poor expressed                                                |
| 55 | 4909453.52 | 263683.616 | PH   | 1.95 | 1.67 | 2.01 | scarp well expressed                                                |
| 56 | 4909462.85 | 263706.622 | 1983 | 0.38 | 0.36 | 0.46 | scarp well expressed                                                |

## Text S2: Scarp-profile locations and VS measurements

|    |            |            |      |      |      |      |                                                        |
|----|------------|------------|------|------|------|------|--------------------------------------------------------|
| 57 | 4909447.69 | 263721.862 | 1983 | 0.65 | 0.47 | 0.82 | scarp well expressed                                   |
| 58 | 4909370.4  | 263873.124 | 1983 | 0.59 | 0.53 | 0.66 | scarp well expressed; minimal vegetation               |
| 59 | 4909367.15 | 263880.083 | 1983 | 0.47 | 0.45 | 0.50 | scarp well expressed; mod vegetation                   |
| 60 | 4909352.28 | 263889.211 | 1983 | 0.49 | 0.37 | 0.55 | scarp well expressed; mod vegetation                   |
| 61 | 4909287.88 | 263928.105 | 1983 | 0.56 | 0.48 | 0.63 | scarp well expressed; lower surface poor constrained   |
| 62 | 4909283.17 | 263931.836 | 1983 | 0.70 | 0.59 | 0.76 | scarp well expressed; poor constrained surfaces        |
| 63 | 4909173.47 | 263961.932 | 1983 | 0.22 | 0.21 | 0.27 | scarp well expressed                                   |
| 64 | 4909165.36 | 263969.473 | 1983 | 0.29 | 0.23 | 0.30 | upper surface very heavy vegetation, poor constrained  |
| 65 | 4909148.15 | 263978.64  | 1983 | 0.34 | 0.34 | 0.40 | scarp well expressed; minimal vegetation               |
| 66 | 4909144.2  | 263978.72  | 1983 | 0.40 | 0.33 | 0.40 | scarp well expressed; mod vegetation                   |
| 67 | 4909116.5  | 263980.625 | 1983 | 0.49 | 0.37 | 0.65 | scarp well expressed; lower surface. uncertain         |
| 68 | 4909075.98 | 263996.143 | 1983 | 0.46 | 0.44 | 0.46 | scarp well expressed; mod vegetation                   |
| 69 | 4909083.1  | 263994.377 | 1983 | 0.26 | 0.24 | 0.37 | scarp well expressed; mod vegetation                   |
| 70 | 4909051.95 | 264016.304 | 1983 | 0.61 | 0.58 | 0.61 | scarp well expressed                                   |
| 71 | 4909039.62 | 264024.003 | 1983 | 0.50 | 0.48 | 0.60 | scarp well expressed; minimal vegetation               |
| 72 | 4909017.74 | 264026.94  | 1983 | 0.55 | 0.36 | 0.65 | scarp well expressed; upper surface. poor constr.      |
| 74 | 4908995.33 | 264057.564 | 1983 | 0.68 | 0.61 | 0.68 | scarp well expressed; rounded scarp face               |
| 75 | 4908987.18 | 264068.016 | PH   | 3.82 | 2.56 | 4.45 | scarp well expressed; VS includes multiple iterations  |
| 76 | 4908946.91 | 264100.056 | 1983 | 0.69 | 0.29 | 0.71 | scarp well expressed; lower surface. poor constr.      |
| 77 | 4908940.16 | 264099.271 | PH   | 3.90 | 3.90 | 4.04 | scarp well expressed; uncertain if surface correlative |
| 78 | 4908926.1  | 264114.066 | 1983 | 0.49 | 0.41 | 0.58 | scarp well expressed; lower surface. uncertain         |
| 79 | 4908828.05 | 264234.577 | 1983 | 0.21 | 0.12 | 0.22 | scarp poorly expressed                                 |
| 80 | 4908816.62 | 264256.782 | 1983 | 0.26 | 0.16 | 0.39 | scarp poorly expressed                                 |
| 81 | 4908779.55 | 264268.47  | 1983 | 0.67 | 0.39 | 0.86 | scarp well expressed; minimal vegetation               |
| 82 | 4908734.72 | 264281.508 | 1983 | 0.34 | 0.24 | 0.47 | scarp mod-poorly expressed; mod-heavy vegetation       |
| 83 | 4908722.38 | 264286.965 | 1983 | 0.47 | 0.39 | 0.57 | scarp mod-well expressed; mod vegetation               |
| 84 | 4908673.11 | 264288.493 | 1983 | 0.38 | 0.30 | 0.50 | scarp mod-well expressed; mod vegetation               |

## Text S2: Scarp-profile locations and VS measurements

|     |            |            |      |      |      |      |                                                                    |
|-----|------------|------------|------|------|------|------|--------------------------------------------------------------------|
| 85  | 4908617.66 | 264283.569 | 1983 | 0.67 | 0.27 | 0.82 | scarp well expressed; lower surface. uncertain--vegetation         |
| 86  | 4908590.98 | 264297.026 | 1983 | 0.89 | 0.72 | 1.03 | scarp well expressed; minimal vegetation                           |
| 87  | 4908575.86 | 264302.304 | 1983 | 0.95 | 0.88 | 0.95 | scarp v. well expressed; minimal vegetation                        |
| 88  | 4908573.1  | 264301.729 | PH   | 1.51 | 1.36 | 1.96 | uncertain if older scarp is present                                |
| 89  | 4908526.38 | 264309.785 | 1983 | 0.88 | 0.78 | 0.99 | scarp v. well expressed; minimal vegetation                        |
| 90  | 4908489.97 | 264310.003 | 1983 | 0.29 | 0.21 | 0.44 | minimum? lower surface. uncertain; mod vegetation                  |
| 91  | 4908462.53 | 264308.178 | 1983 | 0.79 | 0.56 | 0.82 | scarp well expressed; mod vegetation                               |
| 92  | 4908360.38 | 264294.624 | 1983 | 0.42 | 0.36 | 0.46 | scarp mod-well expressed; mod vegetation                           |
| 93  | 4908306.82 | 264292.303 | 1983 | 0.70 | 0.49 | 0.82 | scarp well expressed; mod vegetation                               |
| 94  | 4908284.16 | 264282.46  | PH   | 2.98 | 2.27 | 3.24 | scarp v. well expressed mod vegetation                             |
| 95  | 4908264.28 | 264288.827 | 1983 | 0.49 | 0.43 | 0.57 | scarp well expressed; lower surface uncertain                      |
| 96  | 4908196.07 | 264288.532 | 1983 | 0.64 | 0.31 | 0.71 | lower surface. poorly constrained; double scarp                    |
| 97  | 4908163.21 | 264288.453 | 1983 | 0.61 | 0.42 | 0.74 | scarp well expressed; minimal vegetation; good surfaces            |
| 98  | 4908091.34 | 264304.05  | 1983 | 0.85 | 0.74 | 0.85 | scarp v. well expressed; minimal vegetation; good surface          |
| 99  | 4908068.03 | 264324.939 | PH   | 1.89 | 1.41 | 1.94 | broad scarp; minimal vegetation                                    |
| 100 | 4908041.03 | 264340.255 | 1983 | 0.71 | 0.68 | 0.73 | scarp well expressed; minimal vegetation; lower surface. uncertain |
| 101 | 4908012.49 | 264352.178 | 1983 | 0.73 | 0.63 | 0.73 | scarp v. well expressed minimal vegetation; good surfaces          |
| 102 | 4907970.65 | 264384.649 | 1983 | 1.04 | 0.90 | 1.05 | scarp v. well expressed minimal vegetation; good surfaces          |
| 103 | 4907954.57 | 264395.762 | PH   | 4.48 | 3.81 | 4.93 | broad scarp; minimal vegetation; likely correlative surfaces       |
| 104 | 4907953.28 | 264419.755 | 1983 | 0.53 | 0.39 | 0.71 | scarp well expressed; lower surface. uncertain; mod vegetation     |
| 105 | 4907935.53 | 264463.247 | 1983 | 0.96 | 0.74 | 1.09 | scarp well expressed; minimal vegetation                           |
| 106 | 4907924.69 | 264471.32  | PH   | 2.87 | 2.41 | 3.27 | broad scarp; minimal vegetation; correlative surfaces              |
| 107 | 4907922.08 | 264489.095 | 1983 | 0.53 | 0.40 | 0.55 | scarp well expressed; minimal vegetation; good surfaces            |
| 108 | 4907895.54 | 264563.69  | 1983 | 0.54 | 0.26 | 0.62 | scarp well expressed; minimal vegetation; good surfaces            |
| 109 | 4907793.61 | 264684.138 | 1983 | 1.02 | 0.58 | 1.12 | scarp well expressed; lower surface. uncertain; mod vegetation     |
| 110 | 4907765.69 | 264698.901 | 1983 | 0.43 | 0.32 | 0.46 | scarp poorly expressed; poor surfaces; heavy vegetation            |
| 111 | 4907754.53 | 264709.07  | 1983 | 0.52 | 0.31 | 0.63 | scarp mod expressed; lower surface uncertain; mod vegetation       |

## Text S2: Scarp-profile locations and VS measurements

[illegible]

## Text S2: Scarp-profile locations and VS measurements

|                                                                                                                             |            |            |      |   |   |   |                                                       |
|-----------------------------------------------------------------------------------------------------------------------------|------------|------------|------|---|---|---|-------------------------------------------------------|
| 37                                                                                                                          | 4911637.29 | 261989.303 | 1983 | - | - | - | too vegetated to measure; no signal.                  |
| 43                                                                                                                          | 4910971.83 | 262480.987 | PH   | - | - | - | 1.1-2.1m VS for antithetic scarp combined with p44    |
| 47                                                                                                                          | 4910917.07 | 262778.063 | PH   | - | - | - | 0.98 (0.69-1.15) m VS combined with p46               |
| 48                                                                                                                          | 4910545.74 | 262874.694 | PH   | - | - | - | 12.16 (7.35-17.84) m. Unknown surface, poor surface   |
| 73                                                                                                                          | 4908998.15 | 264043.846 | PH   | - | - | - | 1.56 (1.43-1.78) m culled. Poor surface; edge of fan  |
| 113                                                                                                                         | 4907621.35 | 264825.111 | PH   | - | - | - | not measured--bedrock/alluvial contact?               |
| 114                                                                                                                         | 4907613.42 | 264882.856 | PH   | - | - | - | not measured--bedrock/alluvial contact?               |
| 126                                                                                                                         | 4909515.86 | 263129.222 | 1983 | - | - | - | 0.99(0-1.32) m; lower:0.29-0.61; upper: 0.67-1.28     |
| 131                                                                                                                         | 4910945.26 | 262773.828 | PH   | - | - | - | 0.65 (0.45-0.65) m; summed with p45; heavy vegetation |
| Latitude and longitude reported as WGS 1984, UTM zone 12N.<br>Scarp type: 1983 – 1983 Borah Peak rupture; PH – prehistoric. |            |            |      |   |   |   |                                                       |

| Vertical separation (VS) measurements for the Willow Creek Hills area |             |             |      |                  |                |                |                                                                                |
|-----------------------------------------------------------------------|-------------|-------------|------|------------------|----------------|----------------|--------------------------------------------------------------------------------|
| Name                                                                  | Latitude    | Longitude   | Type | Preferred VS (m) | Minimum VS (m) | Maximum VS (m) | Notes                                                                          |
| 1                                                                     | 4903690.576 | 266861.5924 | PH   | 2.20             | 1.85           | 2.49           | good surface, but mod vegetation; possible scarp burial from adjacent drainage |
| 2                                                                     | 4903635.808 | 266915.0383 | PH   | 2.11             | 1.92           | 2.33           | good surface, but mod vegetation; possible scarp burial from adjacent drainage |
| 4                                                                     | 4902901.214 | 267277.5017 | 1983 | 0.28             | 0.16           | 0.35           | scarp well expressed; min vegetation; dual scarp accounted for in VS           |
| 5                                                                     | 4902890.978 | 267287.5393 | 1983 | 0.22             | 0.15           | 0.22           | scarp poorly expressed; min vegetation                                         |
| 6                                                                     | 4902788.368 | 267326.8552 | 1983 | 0.28             | 0.25           | 0.31           | scarp well expressed; min vegetation; clear surfaces                           |
| 7                                                                     | 4902786.632 | 267327.1409 | 1983 | 0.21             | 0.16           | 0.22           | scarp well expressed; min vegetation, bush on hanging wall; good surface       |
| 8                                                                     | 4902776.874 | 267332.295  | 1983 | 0.29             | 0.28           | 0.31           | scarp well expressed; but limited upper surface; min vegetation                |
| 9                                                                     | 4903416.811 | 267075.5746 | PH   | 3.47             | 3.32           | 3.94           | limited upper surface; mod vegetation                                          |
| 10                                                                    | 4902708.233 | 267386.1246 | 1983 | 1.03             | 0.93           | 1.06           | scarp well expressed, but limited lower surface; min vegetation                |
| 11                                                                    | 4902706.805 | 267386.5016 | 1983 | 0.86             | 0.81           | 0.88           | scarp well expressed; very clear surfaces; no vegetation                       |
| 12                                                                    | 4902697.419 | 267391.2244 | 1983 | 0.85             | 0.81           | 0.95           | scarp well expressed; clear surface, but limited upper surface; min vegetation |
| 13                                                                    | 4902673.197 | 267405.9706 | 1983 | 0.93             | 0.93           | 1.05           | scarp well expressed; clear surface; min vegetation                            |
| 14                                                                    | 4902667.676 | 267409.8897 | 1983 | 1.01             | 0.69           | 1.08           | scarp well expressed; clear surface, but limited lower; min-mod vegetation     |
| 15                                                                    | 4902601.574 | 266883.766  | 1983 | 0.19             | 0.15           | 0.21           | small well def scarp on fan remnant; min-mod vegetation                        |

## Text S2: Scarp-profile locations and VS measurements

|    |             |             |      |      |      |      |                                                                                                      |
|----|-------------|-------------|------|------|------|------|------------------------------------------------------------------------------------------------------|
| 16 | 4902612.141 | 266933.2204 | 1983 | 0.19 | 0.18 | 0.28 | south facing, small well def scarp on fan remnant; mod vegetation                                    |
| 17 | 4902613.15  | 266939.1738 | 1983 | 0.32 | 0.32 | 0.42 | south facing, small well def scarp on fan remnant; mod vegetation                                    |
| 18 | 4902623.332 | 266969.2621 | 1983 | 0.38 | 0.34 | 0.38 | south facing, small mod well defined scarp; good surface, but mod vegetation                         |
| 19 | 4902688.528 | 267151.339  | 1983 | 0.57 | 0.57 | 0.63 | south facing; small, well-expressed scarp; good surface; mod vegetation                              |
| 20 | 4902698.779 | 267222.9535 | 1983 | 0.54 | 0.49 | 0.56 | south facing, small, well-expressed scarp; good surface; dual scarp; mod vegetation                  |
| 21 | 4902700.785 | 267244.1056 | 1983 | 0.57 | 0.53 | 0.59 | south facing, small, well-expressed scarp; good surface; dual scarp; mod vegetation                  |
| 22 | 4902700.929 | 267250.6915 | 1983 | 0.41 | 0.30 | 0.41 | south facing, small, mod-well-expressed scarp; mod surface; mod vegetation                           |
| 23 | 4902636.633 | 267324.7684 | 1983 | 0.58 | 0.49 | 0.61 | south facing, small, well-expressed scarp; poor upper surface - heavy vegetation                     |
| 24 | 4902635.032 | 267328.3535 | 1983 | 0.77 | 0.61 | 0.85 | south facing, small, well-expressed scarp; mod surface; mod vegetation                               |
| 25 | 4902595.896 | 267375.6487 | 1983 | 0.44 | 0.34 | 0.47 | south facing, small, well-expressed scarp; good surfaces, min vegetation                             |
| 26 | 4902591.187 | 267380.3318 | 1983 | 1.04 | 1.00 | 1.13 | south facing, well-expressed scarp; good surface; min vegetation                                     |
| 27 | 4902575.652 | 267407.4822 | 1983 | 0.98 | 0.96 | 0.98 | south facing, well-expressed scarp; good surface; min vegetation; limited lower surface              |
| 28 | 4902530.65  | 267417.2149 | 1983 | 1.04 | 1.00 | 1.19 | west facing scarp; good surface, but heavy vegetation                                                |
| 29 | 4902535.778 | 267416.2386 | 1983 | 0.93 | 0.79 | 1.03 | west facing scarp; good surface, heavy vegetation on lower surface                                   |
| 30 | 4902507.39  | 267431.0487 | 1983 | 0.82 | 0.81 | 0.83 | west facing scarp; well-expressed scarp; mod vegetation, but clear surfaces                          |
| 31 | 4902505.858 | 267434.3665 | 1983 | 0.86 | 0.81 | 0.86 | west facing scarp; well expressed; mod vegetation; clear surfaces                                    |
| 32 | 4902501.222 | 267439.6397 | 1983 | 1.05 | 1.05 | 1.11 | west facing scarp; well expressed; heavy vegetation, but clear surface                               |
| 33 | 4902425.412 | 267450.29   | PH   | 7.35 | 6.93 | 7.87 | large, broad scarp; likely graben; min-mod vegetation                                                |
| 34 | 4902319.392 | 267500.4047 | PH   | 6.11 | 5.56 | 6.57 | large, broad scarp along ridge; dual scarp accounted for in measurement location; minimal vegetation |
| 35 | 4902248.127 | 267488.2079 | PH   | 7.57 | 6.47 | 8.14 | large, broad scarp; dual scarp acct for in measurement location; min-mod vegetation                  |
| 36 | 4902456.22  | 267461.698  | 1983 | 0.50 | 0.45 | 0.60 | minor scarp on planar face; min vegetation; scarp well defined                                       |
| 37 | 4902434.253 | 267465.1905 | 1983 | 0.65 | 0.49 | 0.65 | minor scarp on planar face; min vegetation; scarp well defined                                       |
| 38 | 4902410.798 | 267470.4689 | 1983 | 0.69 | 0.56 | 1.13 | scarp mod expressed; lower surface more uncert; min-mod vegetation                                   |
| 39 | 4902376.944 | 267471.2428 | 1983 | 0.79 | 0.51 | 1.01 | scarp well expressed; lower surface mod uncertain; min vegetation                                    |
| 40 | 4902366.169 | 267478.3469 | 1983 | 0.91 | 0.68 | 1.00 | scarp well expressed; min vegetation                                                                 |
| 41 | 4902355.175 | 267488.745  | 1983 | 0.84 | 0.63 | 0.94 | scarp well expressed; min vegetation; includes 0.36-0.29-0.37m synthetic VS                          |
| 42 | 4902278.658 | 267499.3416 | 1983 | 1.51 | 0.95 | 1.59 | double scarp well expressed; min vegetation                                                          |

## Text S2: Scarp-profile locations and VS measurements

|    |             |             |      |      |      |      |                                                                                                              |
|----|-------------|-------------|------|------|------|------|--------------------------------------------------------------------------------------------------------------|
| 43 | 4902206.387 | 267523.1343 | 1983 | 1.11 | 0.87 | 1.16 | scarp well expressed; lower surface mod uncertain; minimal vegetation                                        |
| 44 | 4902184.42  | 267538.414  | 1983 | 0.84 | 0.63 | 0.86 | scarp well expressed; lower surface mod uncertain; min vegetation                                            |
| 45 | 4902147.649 | 267581.7529 | 1983 | 0.75 | 0.66 | 0.76 | scarp well expressed, but possible min VS because of subparallel strands; min vegetation                     |
| 46 | 4902119.372 | 267588.8768 | 1983 | 0.83 | 0.57 | 1.00 | scarp well expressed; less uncertain in lower slope; min vegetation                                          |
| 47 | 4902075.18  | 267629.9733 | 1983 | 0.92 | 0.71 | 1.01 | scarp well expressed; less uncertain in lower surface; min vegetation                                        |
| 48 | 4902534.309 | 266821.9091 | 1983 | 0.70 | 0.53 | 0.70 | south, uphill facing scarp. Well expressed. Mod uncertain in surface; min vegetation                         |
| 49 | 4902546.883 | 266905.0976 | 1983 | 0.58 | 0.44 | 0.61 | south, uphill facing scarp. Mod-well expressed. Mod uncertain in surface; min vegetation                     |
| 50 | 4902556.557 | 266946.0585 | 1983 | 0.63 | 0.50 | 0.67 | south, uphill facing scarp. Well expressed. Mod uncertain in surface; min vegetation                         |
| 51 | 4902564.974 | 267021.961  | 1983 | 0.40 | 0.34 | 0.42 | south, uphill facing scarp. Well expressed, but heavy vegetation; good surfaces                              |
| 52 | 4902569.803 | 267036.0832 | 1983 | 0.36 | 0.33 | 0.37 | south, uphill facing scarp. Well expressed, mod vegetation; good surfaces                                    |
| 53 | 4902578.947 | 267063.3684 | 1983 | 0.16 | 0.12 | 0.21 | south, uphill facing scarp. Subtle scarp; mod surface; mod vegetation                                        |
| 54 | 4902735.756 | 266044.026  | PH   | 2.95 | 2.24 | 3.09 | PH + 1983? PH scarp crest apparent. Scarp/graben well expressed; mod vegetation                              |
| 55 | 4902709.483 | 266092.8417 | PH   | 3.24 | 3.24 | 3.54 | PH + 1983? weak PH scarp crest apparent. Scarp/graben well expressed; mod vegetation                         |
| 56 | 4902665.734 | 266155.5698 | 1983 | 1.83 | 1.67 | 2.15 | 1983 only, inset surface; scarp well expressed; mod vegetation                                               |
| 57 | 4902570.18  | 266253.7351 | 1983 | 1.50 | 1.15 | 1.67 | 1983 only; inset surface (older than at 200); well-expressed scarp; mod vegetation                           |
| 58 | 4902559.623 | 266302.8684 | 1983 | 1.56 | 1.56 | 1.89 | 1983 only; inset surface (older than at 200); well-expressed scarp; mod vegetation                           |
| 59 | 4902547.716 | 266385.736  | PH   | 1.92 | 1.71 | 1.92 | PH+ 1983 VS? possible older surface; well-expressed scarp; mod vegetation                                    |
| 60 | 4902557.638 | 266459.3168 | PH   | 1.89 | 1.75 | 2.12 | PH + 1983 VS? possible older surface; well-expressed scarp; mod vegetation                                   |
| 61 | 4902544.568 | 266353.5406 | PH   | 3.49 | 3.26 | 3.95 | PH + 1983 VS; older surface(?); well-expressed scarp; mod vegetation                                         |
| 62 | 4902485.314 | 266302.8981 | 1983 | 0.27 | 0.18 | 0.31 | scarp well expressed; good surfaces; min-mod vegetation                                                      |
| 63 | 4902455.747 | 266321.3528 | PH   | 1.48 | 1.42 | 1.57 | PH + 1983; rounded scarp crest; good surfaces; scarp well expressed                                          |
| 64 | 4902436.895 | 266334.2513 | PH   | 1.60 | 1.54 | 1.73 | PH + 1983; rounded scarp less apparent; good surface; scarp well expressed                                   |
| 65 | 4902282.378 | 266442.7968 | 1983 | 0.31 | 0.03 | 0.41 | scarp well expressed; good surfaces; min-mod vegetation; no PH scarp                                         |
| 66 | 4902123.124 | 266591.5553 | 1983 | 0.58 | 0.54 | 0.63 | scarp well expressed; good surfaces; no vegetation; no PH scarp                                              |
| 67 | 4902016.873 | 266666.439  | 1983 | 1.15 | 0.99 | 1.20 | double scarp; well expressed; good surface; measured at both scarps; min vegetation; no prehistoric VS.      |
| 68 | 4901960.842 | 266693.1162 | 1983 | 0.80 | 0.67 | 0.99 | double scarp; well expressed; good surface; preferred VS accounts for both; min/max sum of individual scarps |



## Text S2: Scarp-profile locations and VS measurements

|    |             |             |      |      |      |      |                                                                                                   |
|----|-------------|-------------|------|------|------|------|---------------------------------------------------------------------------------------------------|
| 69 | 4901882.647 | 266786.1363 | 1983 | 0.84 | 0.73 | 0.93 | scarp well expressed; good surface; min vegetation                                                |
| 70 | 4902830.073 | 265831.4535 | 1983 | 1.55 | 1.40 | 1.78 | scarp well expressed, but large graben, multiple measurement locations, min vegetation            |
| 71 | 4902842.724 | 265743.0163 | 1983 | 1.49 | 1.47 | 2.32 | scarp well expressed, but large graben, poor constrained lower surface; heavy vegetation          |
| 72 | 4903033.049 | 265451.2531 | 1983 | 1.78 | 1.78 | 2.10 | scarp well expressed, upper surface slope not consist; PH scarp? min vegetation                   |
| 73 | 4903090.516 | 265365.5279 | 1983 | 1.99 | 1.87 | 2.35 | scarp well expressed; surface slopes not consist; PH scarp? min vegetation                        |
| 74 | 4903175.76  | 265194.2495 | 1983 | 1.97 | 1.90 | 2.33 | scarp well expressed; surface slopes not consist; PH scarp? min vegetation                        |
| 75 | 4903172.312 | 265008.3082 | 1983 | 1.45 | 1.32 | 1.76 | scarp mod expressed; young surface, heavy vegetation; good surface slopes                         |
| 76 | 4903391.702 | 264862.2332 | 1983 | 1.32 | 1.25 | 1.57 | scarp well expressed; slopes not consist; PH scarp? min vegetation                                |
| 77 | 4903410.72  | 264812.7427 | 1983 | 1.22 | 1.02 | 1.38 | scarp well expressed; good surface slopes; min vegetation                                         |
| 78 | 4903433.676 | 264722.0566 | 1983 | 1.16 | 1.03 | 1.34 | scarp mod expressed; good surface, but mod vegetation                                             |
| 79 | 4903385.058 | 264389.1175 | 1983 | 0.81 | 0.47 | 0.88 | scarp well expressed; good surface; measurements include possible synthetic fault; min vegetation |
| 80 | 4903406.367 | 264319.2515 | 1983 | 1.02 | 0.97 | 1.27 | scarp well expressed; v. good surface, but broad graben; min vegetation                           |
| 81 | 4903402.619 | 264238.8445 | 1983 | 0.69 | 0.62 | 0.76 | scarp mod expressed; complex fault zone, but good surface; min vegetation                         |
| 82 | 4901702.5   | 266346.3822 | 1983 | 0.44 | 0.32 | 0.47 | minor scarp; west facing; good surface, but mod-heavy vegetation                                  |
| 83 | 4901595.332 | 266445.6605 | 1983 | 0.44 | 0.35 | 0.49 | minor scarp; west facing; good surface; minor vegetation                                          |
| 84 | 4901565.107 | 266469.8718 | 1983 | 0.63 | 0.52 | 0.75 | west facing, mod expressed; mod vegetation; surface good, clearly offset                          |
| 85 | 4901501.687 | 266543.9908 | 1983 | 0.43 | 0.31 | 0.62 | west facing; good expressed; min vegetation; surface good                                         |
| 86 | 4901426.876 | 266647.2447 | 1983 | 0.33 | 0.20 | 0.43 | West facing; mod expressed; mod vegetation; mod surface                                           |
| 87 | 4901302.816 | 266737.3405 | 1983 | 0.23 | 0.12 | 0.24 | east facing; mod expressed; good surface; mod vegetation; multiple measurement locations          |
| 88 | 4901291.893 | 266823.7972 | 1983 | 0.32 | 0.32 | 0.55 | east facing; mod expressed; mod surface; mod vegetation; multiple measurement locations           |
| 89 | 4901285.855 | 266843.3172 | 1983 | 0.39 | 0.24 | 0.48 | east facing; mod expressed; mod surface; mod vegetation; multiple measurement locations           |
| 90 | 4901272.551 | 266971.8973 | 1983 | 0.40 | 0.31 | 0.44 | east facing; mod expressed; mod surface; mod vegetation; multiple measurement locations           |
| 91 | 4901185.617 | 267140.2973 | 1983 | 0.15 | 0.10 | 0.20 | east facing; good expressed; good surface; min vegetation                                         |
| 92 | 4901123.239 | 267254.7629 | 1983 | 0.27 | 0.14 | 0.36 | east facing; mod expressed; mod surface; min vegetation                                           |
| 93 | 4901083.141 | 267319.9667 | 1983 | 0.42 | 0.31 | 0.49 | east facing; good expressed; good surface; min vegetation                                         |
| 94 | 4901218.557 | 267384.9255 | 1983 | 0.26 | 0.15 | 0.27 | east facing; good expressed; good surface; mod vegetation                                         |
| 95 | 4901224.431 | 267367.3042 | 1983 | 0.25 | 0.21 | 0.26 | east facing; good expressed; mod surface; mod vegetation                                          |

## Text S2: Scarp-profile locations and VS measurements

|                           |             |             |      |      |      |      |                                                                                             |
|---------------------------|-------------|-------------|------|------|------|------|---------------------------------------------------------------------------------------------|
| 96                        | 4901274     | 267259.354  | 1983 | 0.19 | 0.15 | 0.30 | east facing; good expressed; mod surface; mod vegetation                                    |
| 97                        | 4901313.919 | 267191.6991 | 1983 | 0.35 | 0.32 | 0.52 | east facing; good expressed; good surface; min vegetation                                   |
| 98                        | 4901330.457 | 267180.2833 | 1983 | 0.30 | 0.26 | 0.43 | east facing; good expressed; mod surface; min vegetation                                    |
| 99                        | 4901366.335 | 267126.996  | 1983 | 0.28 | 0.28 | 0.39 | east facing; good expressed; good surface; min vegetation                                   |
| 100                       | 4901800.337 | 266697.8118 | PH   | 0.60 | 0.21 | 0.71 | west facing; mod expressed; min includes 0.32m antithetic scarp; preferred is across graben |
| 101                       | 4901520.227 | 267155.1847 | 1983 | 0.04 | 0.02 | 0.05 | east facing scarp; poor expressed; good surface; min vegetation                             |
| 102                       | 4901490.755 | 267199.6743 | 1983 | 0.21 | 0.12 | 0.22 | east facing scarp; mod expressed; good surface; min vegetation                              |
| 103                       | 4900974.43  | 266419.1265 | 1983 | 0.46 | 0.26 | 0.50 | east facing scarp; poor expressed; mod surface; heavy vegetation                            |
| 104                       | 4900782.343 | 266664.3341 | 1983 | 0.14 | 0.04 | 0.20 | faint East facing scarp; poor expressed; mod surface; heavy vegetation                      |
| 105                       | 4903781.784 | 263903.0966 | PH   | 0.20 | 0.17 | 0.25 | east, uphill facing scarp; well expressed; good surface; min vegetation                     |
| 106                       | 4903746.244 | 263918.3882 | PH   | 0.31 | 0.31 | 0.36 | east, uphill facing scarp; well expressed; good surface; min vegetation                     |
| 107                       | 4903663.098 | 263957.3217 | PH   | 0.33 | 0.20 | 0.37 | east, uphill facing scarp; well expressed; good surface; mod vegetation                     |
| 108                       | 4903613.092 | 263980.6183 | PH   | 0.17 | 0.15 | 0.27 | east, uphill facing scarp; well expressed; good surface; min vegetation                     |
| 109                       | 4903507.721 | 264055.7072 | PH   | 0.29 | 0.29 | 0.40 | east, uphill facing scarp; well expressed; variable upper surface slope; min vegetation     |
| 110                       | 4903427.089 | 264123.465  | PH   | 0.49 | 0.36 | 0.55 | east, uphill facing scarp; well expressed; good surface; min vegetation                     |
| 111                       | 4903390.942 | 263520.1917 | 1983 | 0.59 | 0.48 | 0.63 | SW facing scarp; poorly expressed; mod surfaces; heavy vegetation                           |
| 112                       | 4903382.846 | 263559.7205 | 1983 | 0.42 | 0.17 | 0.68 | SW facing scarp; poorly expressed; mod surfaces; heavy vegetation                           |
| 113                       | 4903373.083 | 263601.194  | 1983 | 0.79 | 0.50 | 0.85 | SW facing scarp; poorly expressed; poor surfaces; heavy vegetation                          |
| 114                       | 4903343.037 | 263688.8399 | 1983 | 0.51 | 0.51 | 0.58 | SW facing scarp; mod expressed; mod surfaces; mod vegetation                                |
| 115                       | 4903282.718 | 263755.4092 | 1983 | 0.82 | 0.67 | 1.04 | SW, uphill facing scarp; mod expressed; poor surface; heavy vegetation                      |
| 116                       | 4902770.85  | 267333.2859 | PH   | 4.96 | 4.84 | 5.41 | scarp mod-poor expressed; mod vegetation, but surface diff slope, scarp vegetated           |
| 117                       | 4902745.164 | 267341.2119 | PH   | 4.51 | 4.19 | 4.91 | scarp mod-poor expressed; mod vegetation, but scarp vegetated; similar surface slopes       |
| 118                       | 4902488.702 | 266721.4559 | 1983 | 0.14 | 0.12 | 0.20 | south facing, poorly expressed scarp; good surfaces; mod vegetation                         |
| 119                       | 4902639.905 | 266678.4268 | 1983 | 0.38 | 0.32 | 0.38 | south facing, well-expressed scarp; good surface; mod vegetation                            |
| 120                       | 4902657.003 | 266719.9003 | 1983 | 0.38 | 0.31 | 0.44 | south facing, well-expressed scarp; good surface; mod vegetation                            |
| <b>Culled measurement</b> |             |             |      |      |      |      |                                                                                             |
| 3                         | 4903531.827 | 267004.3147 | PH   | -    | -    | -    | 5m - Poor profile location; poor expressed surfaces                                         |

## Text S2: Scarp-profile locations and VS measurements

Latitude and longitude reported as WGS 1984, UTM zone 12N.  
Scarp type: 1983 – 1983 Borah Peak rupture; PH – prehistoric.
